# Supplementary material
Source: ML conference proceedings conference paper supplement (https://proceedings.neurips.cc/paper_files/paper/2023/hash/3c129892b4f9c8326aba665425a470c5-Abstract.html)
Supplement: Supplementary file 1 [file 3c129892b4f9c8326aba665425a470c5-Supplemental-Conference.zip]

Archive with 4 entries (4 files):
- code_url.txt
- __MACOSX/._code_url.txt
- prompttpp_appendix.pdf
- __MACOSX/._prompttpp_appendix.pdf
