# Supplementary material
Source: ML conference proceedings conference paper supplement (https://proceedings.neurips.cc/paper_files/paper/2023/hash/3c129892b4f9c8326aba665425a470c5-Abstract.html)
Supplement: Supplementary file 1 [file 3c129892b4f9c8326aba665425a470c5-Supplemental-Conference.zip › code_url.txt]

https://drive.google.com/drive/folders/103jzYhKgbhqbGB68jK7fYGmYvzapfTcw
